# Supplementary material for: Development of Antibody-Modified Nanobubbles Using Fc-Region-Binding Polypeptides for Ultrasound Imaging
Source: PubMed Central journal article supplement (PMC6631014; doi:10.3390/pharmaceutics11060283), 2019-06-15
Supplement: pharmaceutics-11-00283-s001.pdf [file pharmaceutics-11-00283-s001.pdf]

# Supplementary Materials: Development of Antibody-Modified Nanobubbles Using Fc-Region-Binding Polypeptides for Ultrasound Imaging

Nobuhito Hamano, Sho Kamoshida, Yamato Kikkawa, Yusuke Yano, Tomomi Kobayashi, Yoko Endo-Takahashi, Ryo Suzuki, Kazuo Maruyama, Yuji Ito, Motoyoshi Nomizu and Yoichi Negishi

Table S1. Primer sets.

| rProtein                                          | Primer    | Sequence (5'-3')                            |
|---------------------------------------------------|-----------|---------------------------------------------|
| Mouse CD146                                       | MsMCAM01  | GGAATTCGCCACCATGGGGCTGCCCAAACCTGGTGTGC      |
|                                                   | MsMCAM02  | CGTCTAGACCGACCACACCTTTGCTCTCTGGCTG          |
| Signal sequence of human laminin $\gamma$ 2 chain | HG2SIG-03 | CGCAATTGACCGCCATGCCTGCGCTCTG                |
|                                                   | HG2SIG-06 | AGACTCCACCAGCTGAACCTCCACTTCCCTCCTGGAGGTGGC  |
| 4D5 scFv                                          | 4D5-01    | GCCACCTCCAGGAGGGAAGTGGAGGTTTCAGCTGGTGGAGTCT |
|                                                   | 4D5-02    | CGCCTAGGCCTTGATCTCCACCTTGGTACC              |

## Experimental section

Production and purification methods were shown in Section 2.2. The purified proteins were confirmed by SDS-PAGE using 5–20% gels under reducing conditions.

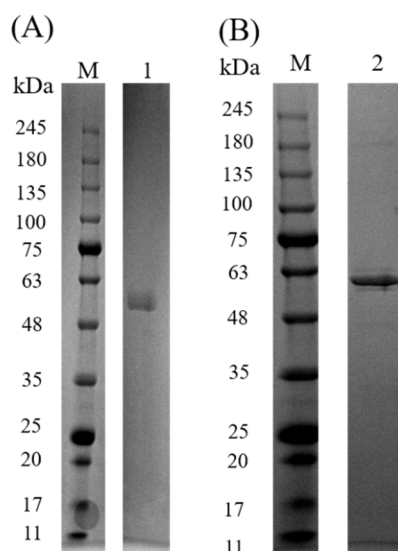

**Figure S1.** SDS-PAGE analysis of purified mouse CD146 antibody (A) and 4D5-Fc antibody (B). M: Molecular weight marker, 1: mouse anti-CD146 antibody (Reducing condition), 2: 4D5-Fc antibody (Reducing condition).

Ninety-six-well ELISA plates (Thermo Fisher Scientific) were coated with Fc-binding polypeptides (Fc-A59 and Fc-G67) and blocked with 1% BSA in PBS (-). Polypeptides were added and incubated at room temperature for 1 h. After washing with PBS-T, the bound polypeptides were detected using a biotinylated anti-human IgG1 Fc mAb (3  $\mu$ g/mL). After further washing, the bound

antibodies were detected by addition of streptavidin-conjugated horseradish peroxidase, followed by addition of 0.4 mg/mL o-phenylenediamine and 0.01% H<sub>2</sub>O<sub>2</sub>. The absorbance was measured at 450 nm with a Multiskan GO microplate Spectrophotometer (Thermo Fisher Scientific).

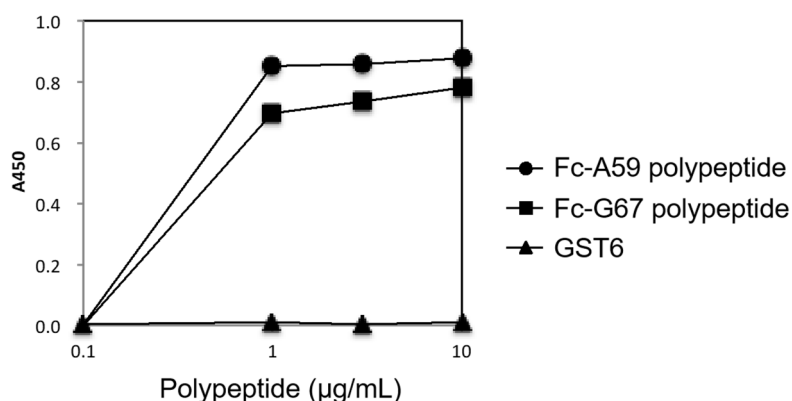

**Figure S2.** ELISA using the Fc-binding polypeptide demonstrates binding to the human IgG1 Fc.

Preparation methods of antibody-modified liposomes/NBs were shown in Section 2.3. The mean size and size distribution of the liposomes/NBs were determined via light scattering with a particle sizer (Nicomp 380ZLS, Santa Barbara, CA, USA).

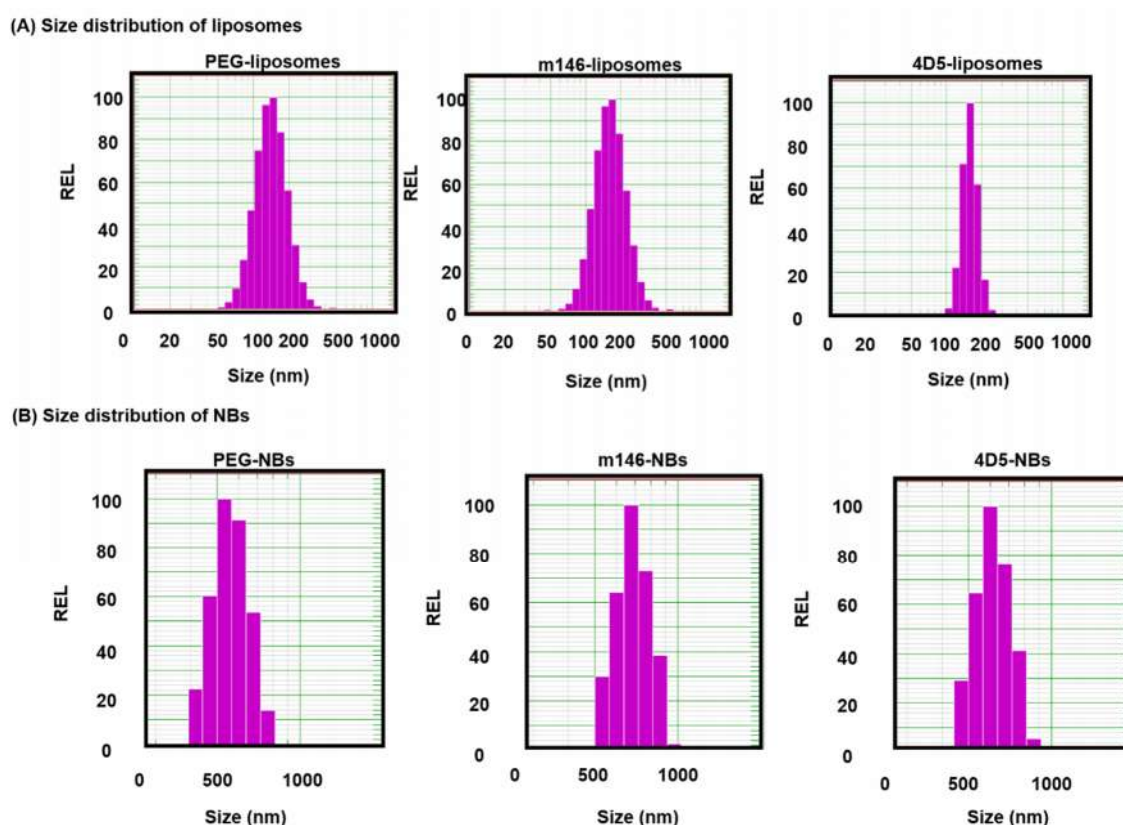

**Figure S3.** Size distribution of liposomes (A) and NBs (B).

The preparation of antibody-modified NBs is the same as in the manuscript. SKOV3 ( $3 \times 10^4$  cells/well) were seeded in the wells of a 96-well plate and incubated overnight at 37 °C in 5% CO<sub>2</sub>. Then, 60 µL of NBs (Lipid concentration: 1 mg/mL) was mixed with the medium (360 µL) and added to the cells. The plates were sealed with sterile tape and inverted for 5 min. After incubation, the plates were reinverted for 5 min, and each well was washed with PBS twice to remove the non-adherent NBs. The cells were fixed with 4% paraformaldehyde, and the nuclei were counterstained

with DAPI. The samples were then observed via fluorescent microscopy and analyzed using a BZ-X700 microscope (KEYENCE, Japan).

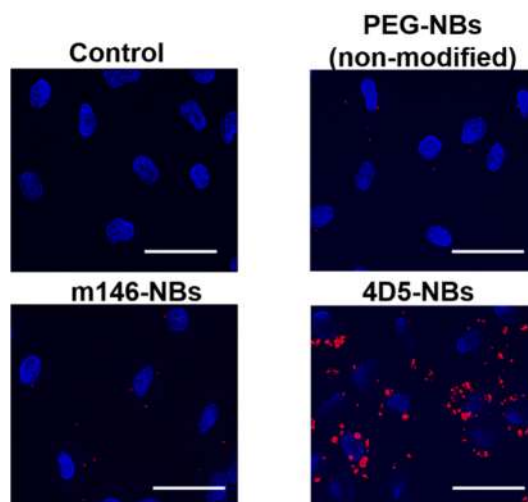

**Figure 4.** Specific attachment of anti-HER2 antibody-modified NBs to SKOV3. SKOV3 were incubated with DiI-labeled NBs for 5 min. After incubation, the cells were washed and treated with DAPI for nuclear staining. The treated cells were examined using a fluorescence microscope. Blue: Fluorescence of DAPI, Red: Fluorescence of DiI. Scale bars represent 50  $\mu\text{m}$ .

The preparation of polypeptide-modified Lips is the same as in the manuscript. Antibodies were added into polypeptide-modified liposomes and incubated for 15 min at RT (2  $\mu\text{g}$  antibody/100  $\mu\text{g}$  lipid). The lipid concentration of antibody-modified liposomes was measured using the Phospholipid C test (Wako Pure Chemical Industries, Ltd., Osaka, Japan). SKOV3 or HUVEC ( $3 \times 10^4$  cells/well) were seeded in the wells of a 96-well plate and incubated overnight at 37°C in 5% CO<sub>2</sub>. 100  $\mu\text{g}$  of Lips was mixed with the medium and added to the cells. The plates were incubated for 60 min at 37 °C in 5% CO<sub>2</sub>. After incubation, each well was washed with PBS twice to remove free Lips. Cells were fixed by 4% paraformaldehyde, and the nucleus was counterstained with DAPI. The samples were fluorescently observed and analyzed using a BZ-X700 microscope (KEYENCE, Japan).

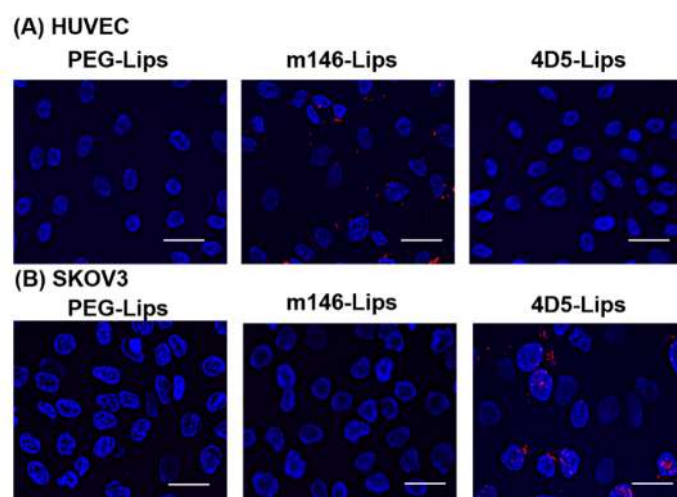

**Figure 5.** Cellular uptake of antibody-modified liposomes (Lips) into HUVEC (A) and SKOV3 (B). Cells were incubated with DiI-labeled lips for 60 min. After incubation, the cells were washed and treated with DAPI for nuclear staining. The treated cells were examined using a fluorescence microscope. Blue: Fluorescence of DAPI, Red: Fluorescence of DiI. Scale bars represent 30  $\mu\text{m}$ .
